# Supplementary material for: From darkness to autonomy: The social and economic return of treating Retinopathy of Prematurity (ROP)
Source: Research Square preprint supplement (doi:10.21203/rs.3.rs-8634905/v1), 2026-02-16
Supplement: Supplementary file 1 [file 45cd50998a649aecd2c644c6.xlsx]

## Sheet: Table 3. Sensitivity analysis
Table 3. Sensitivity analysis
Case			Mean	Mean difference vs baseline scenario (%)	95% Confidence Interval
(a)	Years Mothers Remain Out of the Labor Market	0	49.9753	5.14439	68.1-31.8
		10	46.082	-3.04683	62.8-29.3
		18	44.8883	-5.55826	61.2-28.6
(b)	Mother's Opportunity Cost	Duplicate	50.172	5.55826	68.4-32.0
		Minimum wage	46.5353	-2.09311	63.4-29.6
(c)	Visual acuity utility value of non treated infants	0.61	27.8915	-41.3183	38.0-17.8
		0.72	17.6046	-62.9612	24.0-11.2
	Visual acuity utility value of treated infants	0.81	40.984	-13.7728	55.9-26.1
(d)	IMO's total costs	+50%	36.4091	-23.398	49.4-23.4
		+75%	32.6563	-31.2936	44.3-21.0
		Duplicate	29.63	-37.6606	40.1-19.1
		Triplicate	21.718	-54.307	29.3-14.1
(e)	Discount rate	0	255.501	437.555	348.2-162.8
		0.05	85.5094	79.9056	116.6-54.5
		0.15	32.5054	-31.6111	44.3-20.7
Average			54.5375	14.7428
Std. Dev			57.8558	121.724
Minimum			17.6046	-62.9612
Maximum			255.501	437.555
