# Supplementary material for: From darkness to autonomy: The social and economic return of treating Retinopathy of Prematurity (ROP)
Source: Research Square preprint supplement (doi:10.21203/rs.3.rs-8634905/v1), 2026-02-16
Supplement: Supplementary file 2 [file 8b0caec2d020a43c22386779.xlsx]

## Sheet: Hoja1
Table 2. Summary statistics of the value of inputs by stakeholders and IMO
Patient and Primary Caregiver
	Mean	Std. Dev	Min	Max
Travel expenses2	3417.6	6735.2	$ -	56128.4
Time3	33.8	33.4	9.3	177.4
Food expenses4	197.6	230.3	$ -	1227.7
Consultation	443.4	514.7	$ -	2850
IMO
	Mean	Std. Dev	Min	Max
Travel expenses2	44.1	50.3	$ -	168.3
Time5	212	165.4	42.6	912.3
Special equipment6	23.5	16.8	4.4	99.3
Medical resources7	307.7	876.7	6.6	5451.8
Total
	Mean	Std. Dev	Min	Max
Travel expenses	3461.8	6722.6	34.7	56128.4
Time	245.8	197.5	52	1089.7
Food expenses	197.6	230.3	$ -	1227.7
Consultation	443.4	514.7	$ -	2850
Special equipment	23.5	16.8	4.4	99.3
Medical resources	307.7	876.7	6.6	5451.8
Source: Authors’ own elaboration based on IMO administrative data.
Notes:
1 All values are expressed in Mexican pesos and calculated at 2024 price levels.
2 Travel costs estimated using the methodology of the Mexican Institute of Transport.
3 Estimated value of the mother’s time based on the 2024 general minimum daily wage.
4 Cost of one meal and one baby formula per visit.
5 Estimated value of hospital staff time dedicated to each patient.
6 Cost of ophthalmologic and specialized equipment, assuming a 20% annual depreciation rate.
7 Cost of consumables, diagnostic supplies, and medications.
