# Supplementary material for: From darkness to autonomy: The social and economic return of treating Retinopathy of Prematurity (ROP)
Source: Research Square preprint supplement (doi:10.21203/rs.3.rs-8634905/v1), 2026-02-16
Supplement: Supplementary file 3 [file f24708dcac7710497c5f4ccc.xlsx]

## Sheet: Hoja1 (2)
Table 1. Descriptive statistics of preterm infants screened by IMO
Variable	Preterm infants treated for ROP			Preterm infants not treated for ROP
	Mean	Std Dev	95% Confidence Interval	Mean	Std Dev	95% Confidence Interval
Women	0.606061	0.0863769	0.4-0.8	0.456989	0.0366245	0.4-0.5
Twin	0.181818	0.0681818	0-0.3	0.139785	0.0254946	0.1-0.2
Gestational age (weeks)	30.8818	0.473332	29.9-31.8	32.1102	0.173117	31.8-32.5
Birth weight (grams)	1436.52	73	1287.8-1585.2	1572.14	32.1898	1508.6-1635.7
Vaginal delivery	0.121212	0.0576953	0-0.2	0.102151	0.0222657	0.1-0.1
Caesarean section	0.818182	0.0681818	0.7-1	0.741935	0.0321708	0.7-0.8
Pulmonary surfactant	0.757576	0.0757576	0.6-0.9	0.462366	0.0366565	0.4-0.5
Oxigen	0.909091	0.0508197	0.8-1	0.806452	0.0290468	0.7-0.9
Blood transfusion	0.30303	0.0812409	0.1-0.5	0.177419	0.0280869	0.1-0.2
Phototherapy	0.484849	0.0883478	0.3-0.7	0.360215	0.0352949	0.3-0.4
Meconio	0.030303	0.030303	0-0.1	0.0483871	0.0157764	0-0.1
Fetal distress	0.333333	0.0833333	0.2-0.5	0.370968	0.0355156	0.3-0.4
Hyperbilirubinemia	0.69697	0.0812409	0.5-0.9	0.462366	0.0366565	0.4-0.5
Malformations	0.030303	0.030303	0-0.1	0.0376344	0.0139919	0-0.1
Hyaline membrane disease	0.151515	0.0633833	0-0.3	0.0645161	0.018062	0-0.1
Respiratory distress syndrome	0.878788	0.0576953	0.8-1	0.688172	0.0340581	0.6-0.8
Sepsis	0.787879	0.0722681	0.6-0.9	0.666667	0.0346583	0.6-0.7
Vitamine E deficiency	0		0-0	0.016129	0.0092616	0-0
Diabetes	0.0909091	0.0508197	0-0.2	0.102151	0.0222657	0.1-0.1
Hypertension	0.181818	0.0681818	0-0.3	0.150538	0.0262911	0.1-0.2
Premature rupture of membranes	0.30303	0.0812409	0.1-0.5	0.198925	0.0293491	0.1-0.3
Toxemia	0.0909091	0.0508197	0-0.2	0.182796	0.028416	0.1-0.2
Placental abruption	0		0-0	0.0430108	0.0149161	0-0.1
Placenta previa	0.030303	0.030303	0-0.1	0.0322581	0.0129901	0-0.1
Chorioamnionitis	0.181818	0.0681818	0-0.3	0.0215054	0.0106651	0-0
Multiple pregnancy	0.181818	0.0681818	0-0.3	0.166667	0.0273998	0.1-0.2
Prenatal steroids	0.575758	0.0873679	0.4-0.8	0.494624	0.0367586	0.4-0.6
Source: Authors’ own elaboration based on IMO administrative data.
Notes: All variables, except gestational age and birth weight, are coded as dummy indicators taking the value 1 when the specified condition is present and 0 otherwise.
